# Supplementary material for: Exploring Hydrogenotrophic Methanogenesis: a Genome Scale Metabolic Reconstruction of Methanococcus maripaludis
Source: PubMed Central journal article supplement (PMC5116941; doi:10.1128/jb.00571-16), 2016-11-18
Supplement: JB.00571-16_zjb999094267so1.pdf [file JB.00571-16_zjb999094267so1.pdf]

## 1 **Supplementary Text S1: Comparison with Genome-Scale Essentiality Indices**

2 A previous group performed a genome-scale analysis of gene function of *Methanococcus*  
3 *maripaludis* via a saturated transposon mutagenesis (TN-seq) technique on rich and minimal  
4 media (1). Although this dataset does not contain the same quality of knockout data as actual  
5 knockout experiments, it provides a valuable “first pass” test set for gene essentiality of our  
6 model. For minimal medium in particular, their data included 2 whole genome libraries of  
7 mapped insertions, each of which contained growth data for 7 (T1) and 14 generations (T2).  
8 Reasoning that essential genes would likely be conserved across mutants, they correlated number  
9 of insertions at a particular gene location with gene essentiality by calculating an “essentiality  
10 index” (EI) for each location. Based upon a set of “known essential” genes, they set a cutoff of  
11  $EI \leq 3$  for essential genes, effectively creating predictions of gene essentiality for all genes.

12 Considering the 4 sets of library:generation combinations for minimal medium—Lib.1:T1,  
13 Lib.1:T2, Lib.2:T1, Lib.2:T2—each gene could be predicted to be essential in 0-4 cases. Rather  
14 than globally classify gene essentiality based on all 4 cases, we created 4 separate sets of  
15 essential genes by setting different essentiality thresholds. For example, in “4 instances”, only  
16 genes that were predicted as essential in all 4 libraries were treated as essential genes and all  
17 other genes were considered non-essential; in “1 instance”, all genes that were predicted as  
18 essential in at least 1 library were treated as essential genes. The iMR539 reconstruction shared  
19 537 genes with this dataset, thus we were able to compare gene essentiality predictions across  
20 nearly the entire model to the TN-seq data for minimal medium.

21 As shown by Figure S1, different thresholds had a great effect on the EI predictions; a lower  
22 threshold necessarily caused an increase in negative (no-growth) outcomes and a decrease in  
23 positive (yes-growth) outcomes. Our model experienced no change in its gene essentiality

24 predictions in relation to threshold, hence a decrease in threshold resulted in improved  
25 performance on negative predictions and decreased performance on positive predictions. The  
26 threshold's effect on overall performance, displayed in Figure S2, shows that our model's  
27 predictive accuracy in the four cases ranged from 61.3-65.0% and was maximized in the "3  
28 instances" dataset, whereas MCC ranged from 0.277-0.317 and was highest for "2 instances".  
29 This small discrepancy reflects the difference in how these metrics are calculated, with MCC  
30 putting greater emphasis on our model's improved ability to predict true negative outcomes.

31 Overall, this analysis revealed a slight positive correlation between EI predictions and gene  
32 essentiality predictions from our model. It is important to keep in mind that EI, like our  
33 reconstruction, is a model of gene essentiality and should not be confused for actual knockout  
34 data. Through different methods, both models provide hypotheses for gene functions outside  
35 known metabolism and could fuel future investigations to directly measure gene essentiality.

36

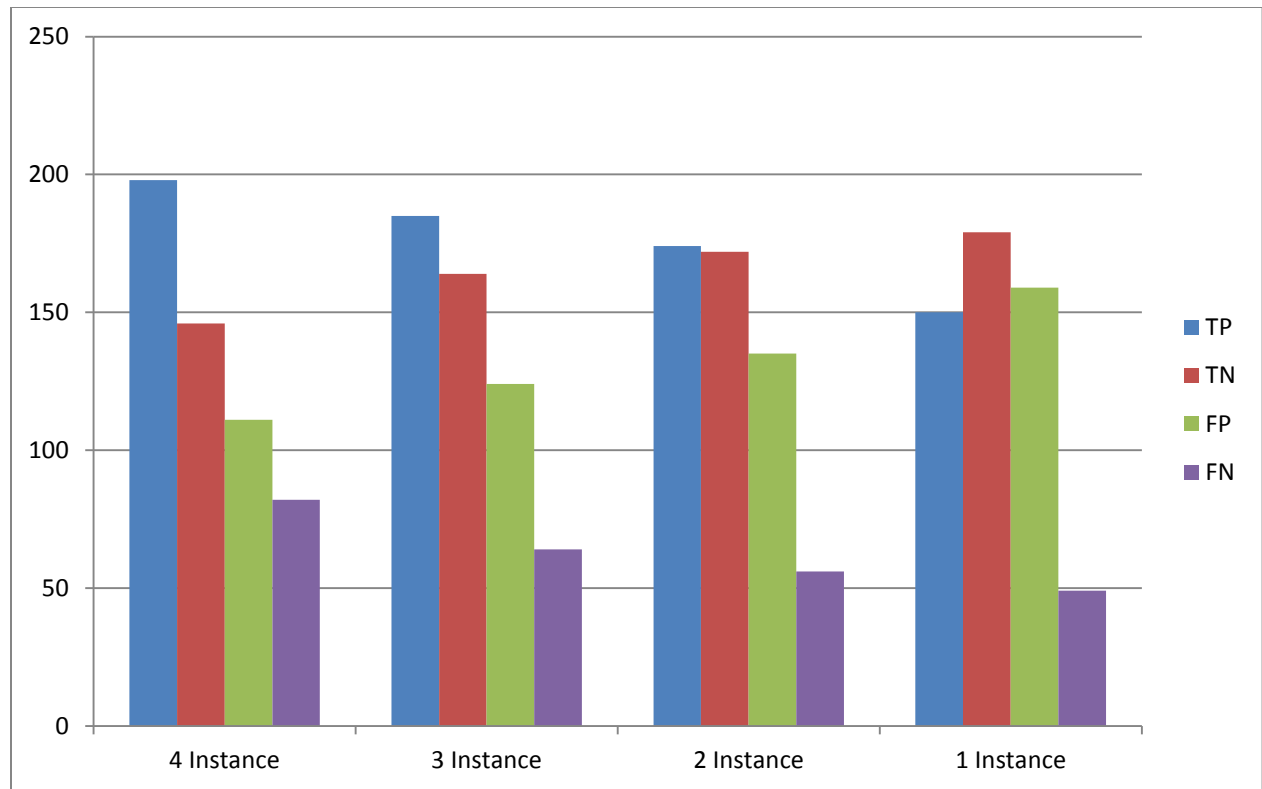

37

38 Figure S1: Comparison of model predictions with genome-scale essentiality indices (EI) on  
 39 minimal media across 4 libraries. Instances indicate the threshold of libraries for qualifying a  
 40 gene as lethal. Positive results indicate predicted non-lethal genes, negative results indicate  
 41 predicted lethal-genes. TP: true positive, model and EI both predict non-lethality; TN: true  
 42 negative, model and EI both predict lethality; FP: false positive, model predicts non-lethality, EI  
 43 predicts lethality; FN: false negative, model predicts lethality, EI predicts non-lethality.

44

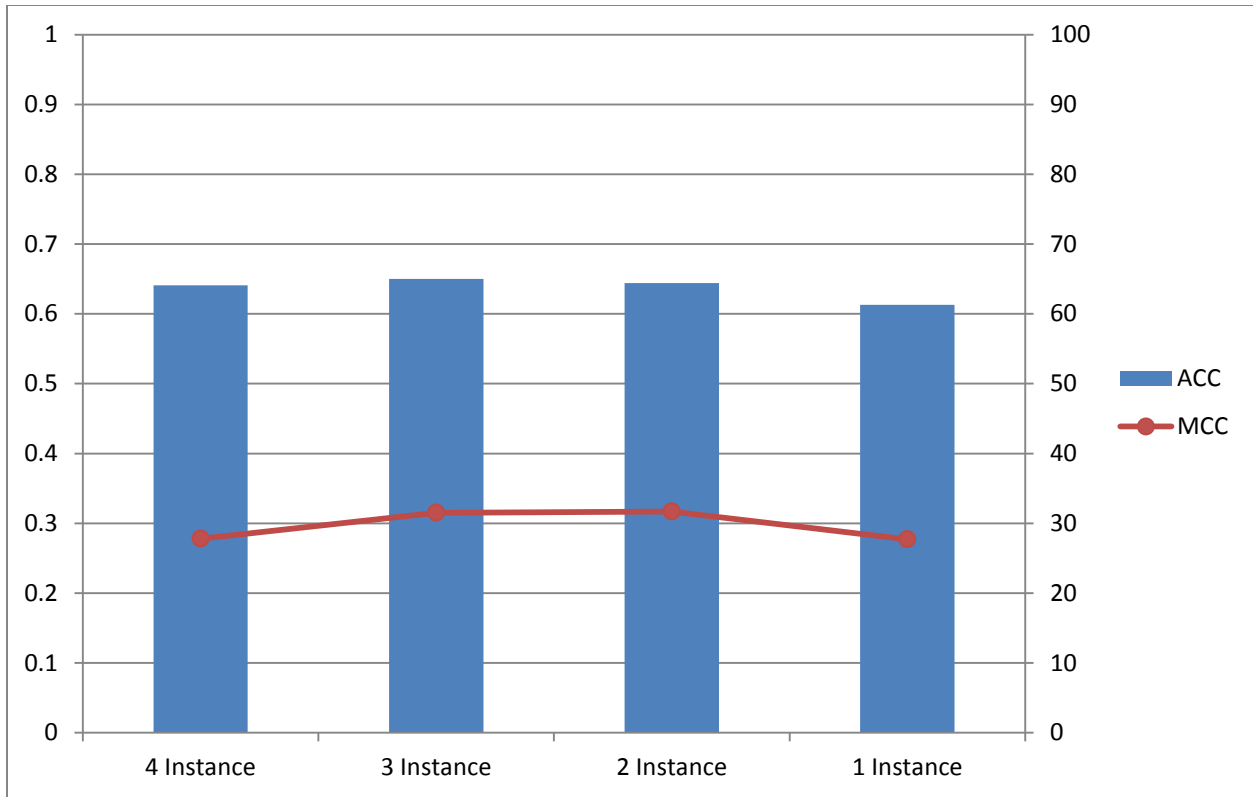

45

46 Figure S2: Matthews Correlation Coefficient (MCC; left y-axis) and predictive accuracy (ACC;  
 47 right y-axis) comparing model predictions with genome-scale essentiality indices (EI) on  
 48 minimal media across 4 libraries. Instances indicate the threshold of libraries for qualifying a  
 49 gene as lethal.

50

51 **Supplementary Text S2: Plots Illustrating Determination of Growth Yield**  
52 **Parameters**

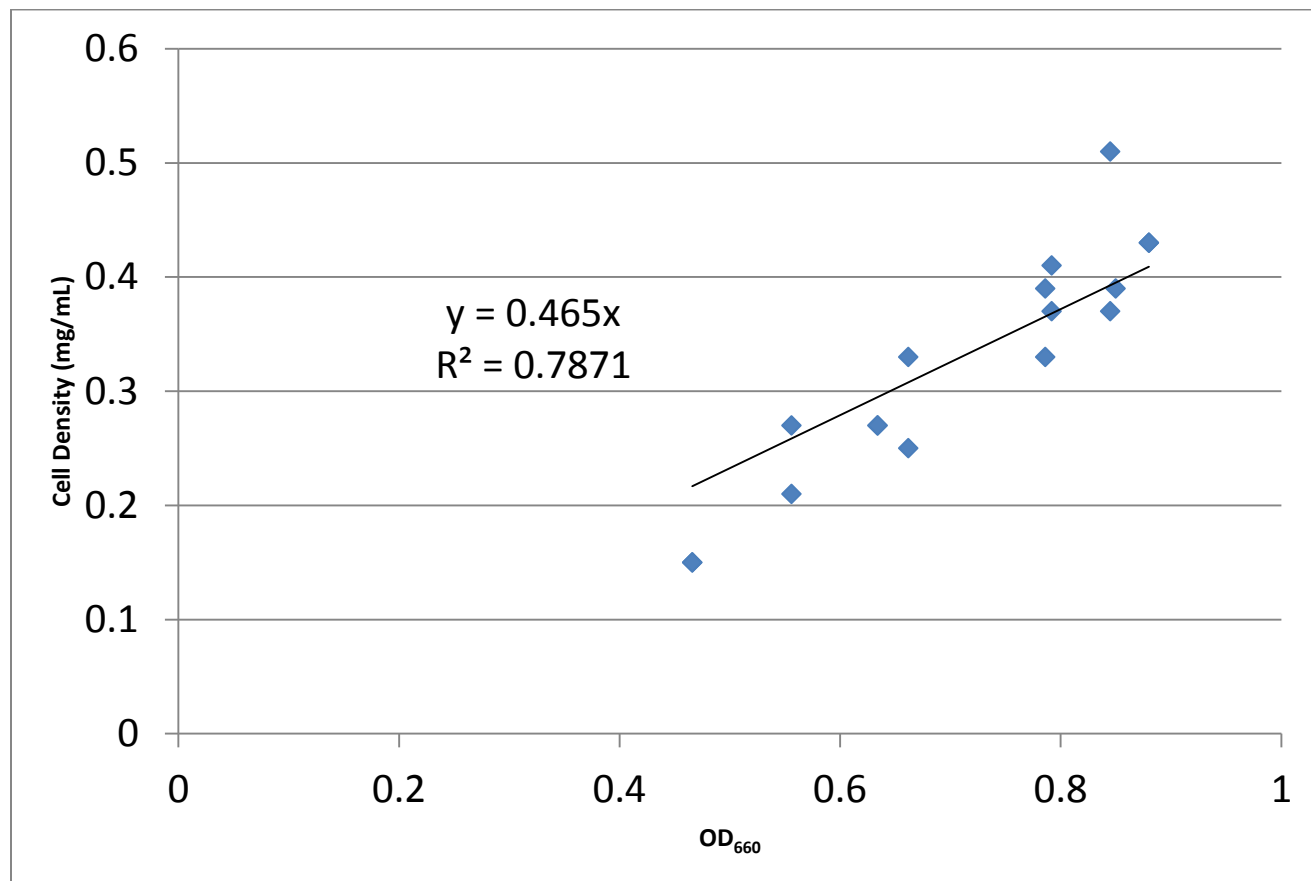

53  
54 Figure S3: Determination of the relationship between cell density and optical density (OD<sub>660</sub>).  
55 Linear regression was set to intersect (0,0), as cell density must necessarily be 0 when OD<sub>660</sub> = 0.  
56 For specific methodology on how these points were gathered, see Methods.

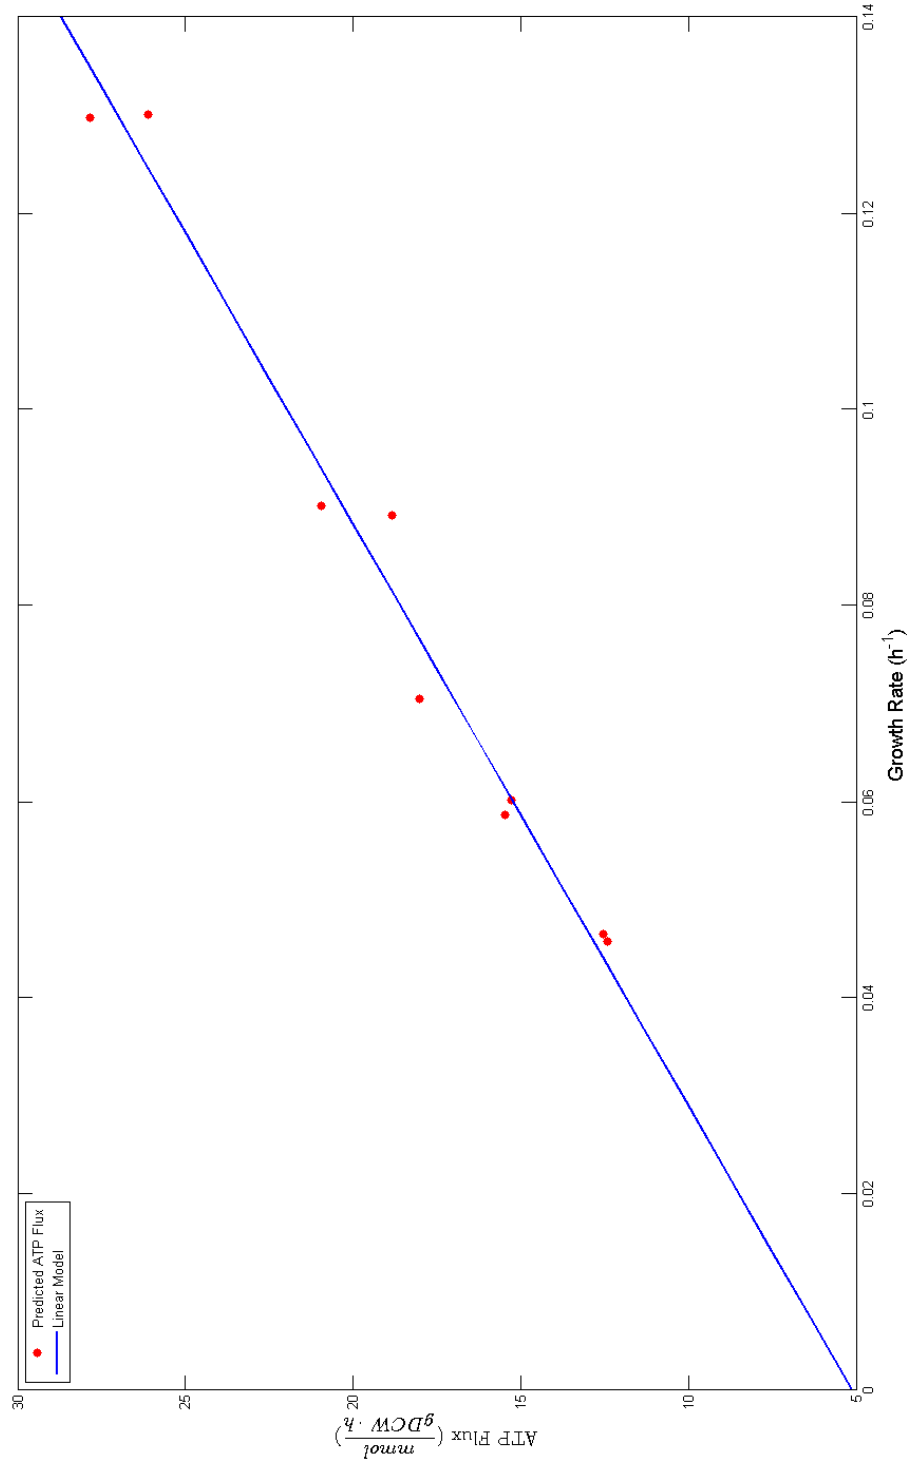

57

58 Figure S4: Illustration of the process used to determine ATP maintenance values (see Methods).  
 59 Using all 9 measured samples, GAM (slope) and NGAM (y-intercept) were determined as 168.4  
 60 (mmol per grams [cell mass]) and 5.12 (mmol per grams [cell mass] per hour), respectively.

61

## 62 **Supplementary Text S3: Demonstrating our Free Energy Estimation**

### 63 **Capabilities**

64 By including available free energy of formation values for exchange metabolites, we have  
65 equipped our model to quickly estimate overall free energy generation. To demonstrate this  
66 functionality, we consider the case of hydrogen concentrations in methanogenic environments. In  
67 our growth simulations we accept a list of exchange metabolites and a vector of their  
68 concentrations in units of mM (see <https://github.com/marichards/methanococcus>). By default,  
69 we assume that all aqueous concentrations for these metabolites are 1 mM, thus if concentrations  
70 are not supplied we calculate overall free energy as follows:

```
71 >> solution = maxGrowthOnH2Only(model);
72
73 Biomass flux: 0.096861
74
75 Formate flux: 0.000000
76 CO2 flux: -52.579347
77 H2 flux: -205.169846
78 H2O flux: 103.908440
79 CH4 flux: 50.000000
80 NH3 flux: -0.752865
81 PO4 flux: 0.009705
82 Acetate flux: 0.000000
83
84 Overall reaction:
85 CO2 + 4 H2 --> 2 H2O + CH4
86
87 Model overall reaction (per mole CH4)
88 1.05 CO2 + 4.10 H2 --> 2.08 H2O + CH4
89
90 Predicted Yield Coefficient: 2.79 gDCW/mol CH4
91
92 Expected ATP/CH4 Yield: 0.5
93 Predicted ATP/CH4 Yield: 0.475
94
95 Warning: All external metabolite concentrations set to 1 mM
96 > In maxGrowthOnH2Only at 99
97
98 Predicted Free Energy Generation: -6.457393 kJ/gDCW
99
```

100 A key feature of hydrogenotrophic methanogens is their ability to thrive in conditions with low  
101 H<sub>2</sub> partial pressure (~10 Pa). Converting to aqueous concentration via Henry's Law coefficient  
102 (2), 10 Pa corresponds to  $7.7 \times 10^{-5}$  mM. We can estimate overall free energy for this hydrogen  
103 concentration by specifying this parameter:

```
104 >> solution = maxGrowthOnH2Only(model, {'EX_cpd11640[e0]'}, [7.7e-5]);
105
106 Biomass flux: 0.096861
107
108 Formate flux: 0.000000
109 CO2 flux: -52.579347
110 H2 flux: -205.169846
```

111 H2O flux: 103.908440  
112 CH4 flux: 50.000000  
113 NH3 flux: -0.752865  
114 PO4 flux: 0.009705  
115 Acetate flux: 0.000000  
116  
117 Overall reaction:  
118 CO2 + 4 H2 --> 2 H2O + CH4  
119  
120 Model overall reaction (per mole CH4)  
121 1.05 CO2 + 4.10 H2 --> 2.08 H2O + CH4  
122  
123 Predicted Yield Coefficient: 2.79 gDCW/mol CH4  
124  
125 Expected ATP/CH4 Yield: 0.5  
126 Predicted ATP/CH4 Yield: 0.475  
127  
128 Predicted Free Energy Generation: -1.448827 kJ/gDCW  
129

130 As illustrated by this quick calculation, we predict overall free energy of the system to still be  
131 favorable for methane generation from H<sub>2</sub>, though of much smaller magnitude than at higher H<sub>2</sub>  
132 concentrations. Assuming other external metabolite concentrations remain at 1 mM, we can also  
133 conduct a short sensitivity analysis of H<sub>2</sub> concentration on overall free energy. Setting H<sub>2</sub>  
134 concentrations from (10<sup>-10</sup> - 10<sup>0</sup>), we can calculating the overall free energy for methanogenesis  
135 in each case produces Figure S5. This figure shows the expected logarithmic relationship  
136 between H<sub>2</sub> concentration and overall free energy, with ΔG = 0 at [H<sub>2</sub>] ≈ 5 x 10<sup>-6</sup> mM (P<sub>H<sub>2</sub></sub> ≈ 0.65  
137 Pa).

138



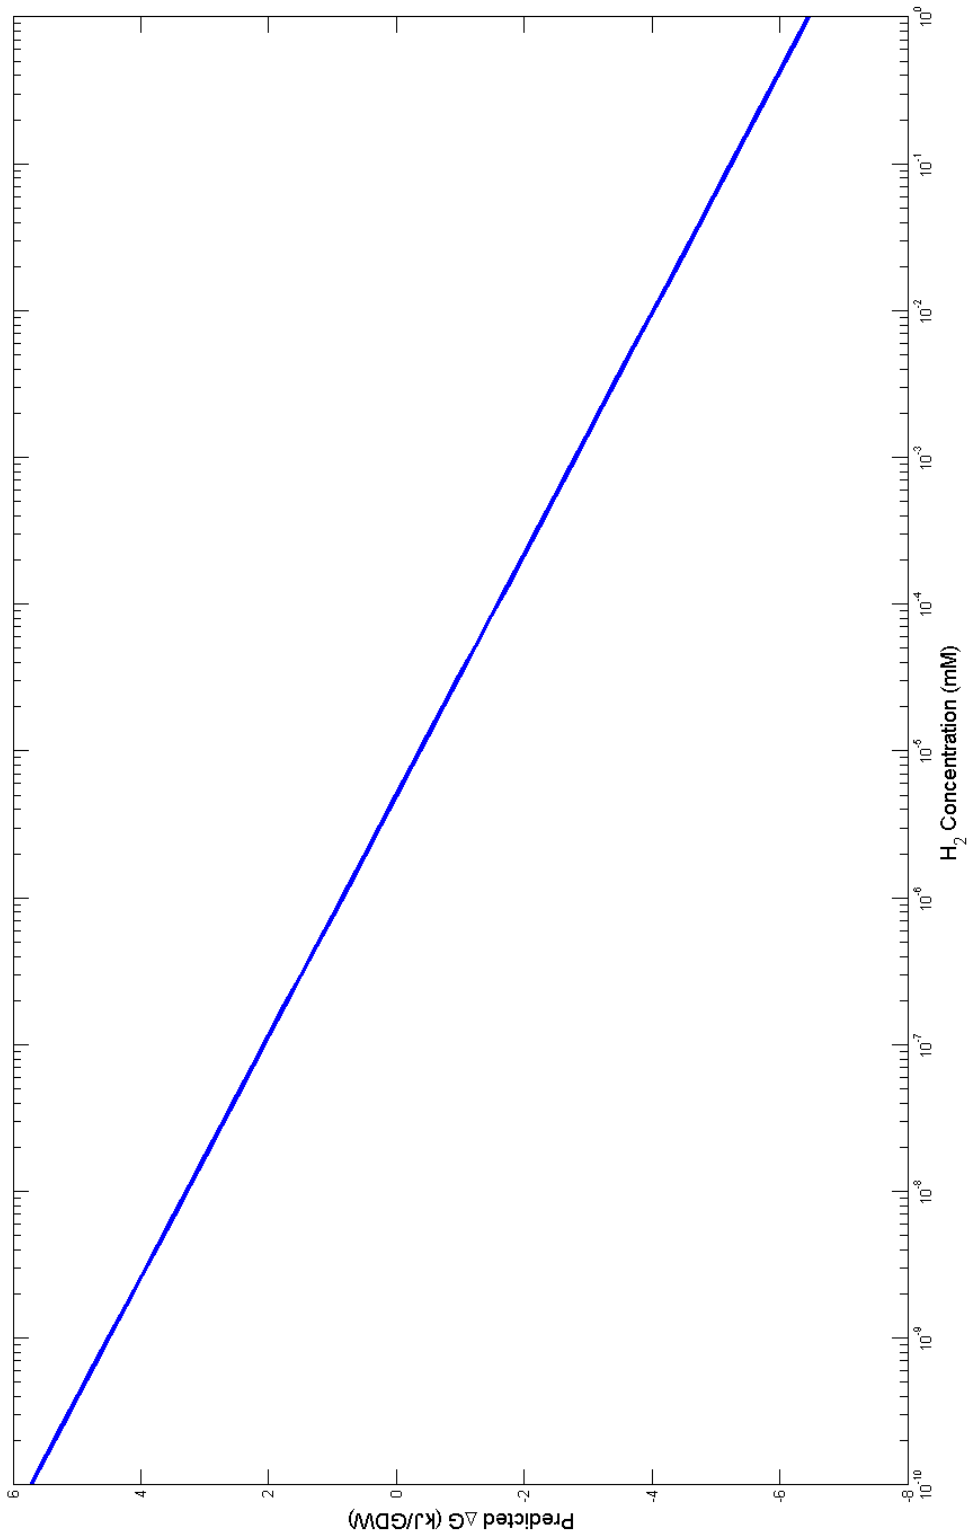

139

140 Figure S5: Semi-log plot showing our sensitivity analysis of the effects of [H<sub>2</sub>] on overall free  
141 energy generation(ΔG).

142 **Supplementary Text S4: Description of Select Files**

143 We have created the iMR539 reconstruction in both XML (SBML) and Matlab data structure  
144 formats and made those available along with our scripts for working with the model. for the most  
145 up to date scripts and model files, please refer to our GitHub repository  
146 (<https://github.com/marichards/methanococcus>). A selection of these materials are briefly  
147 described below; please note that all scripts are dependent on the COBRA Toolbox 2.0.5 in  
148 Matlab (3)

149 **iMR539.xml**

150 This file contains the *M. maripaludis* model in SBML, an extensible format compatible with  
151 most constraint-based modeling platforms. It is identical to the model we deposited in the  
152 Biomodels database (4) with identifier MODEL1607200000.

153 **iMR539.mat**

154 This file contains the *M. maripaludis* model in Matlab data structure format, the standard format  
155 used for constraint-based modeling in the COBRA toolbox. In addition to the standard COBRA  
156 model fields, this model file includes additional metadata, including free energies of formation  
157 for exchange reactions in kJ/mmol.

158 **maxGrowthOnH2.m**

159 This Matlab script simulates iMR539 for maximum biomass production during growth on  
160 hydrogen with acetate supplementation and using ammonia as the nitrogen source. The script not  
161 only returns the flux solution, but also prints out physiologically-relevant parameters including  
162 relevant in/out fluxes, predicted biomass yield, and the predicted overall chemical reaction. It is  
163 dependent on the following included scripts: switchToH2.m, switchToNH3.m,  
164 setMethaneSecretion.m, optimizeThermoModel.m.

165 **maxGrowthOnFormate.m**

166 This Matlab script simulates iMR539 for maximum biomass production during growth on  
167 formate with acetate supplementation and using ammonia as the nitrogen source. The script not  
168 only returns the flux solution, but also prints out physiologically-relevant parameters including  
169 relevant in/out fluxes, predicted biomass yield, and the predicted overall chemical reaction. It is  
170 dependent on the following included scripts: switchToFormate.m, switchToNH3.m,  
171 setMethaneSecretion.m, optimizeThermoModel.m.

172 **simulateKOPanel.m**

173 This Matlab script simulates iMR539 for growth on the knockout panel shown in Figure 5 (see  
174 main text). It prints out the predicted wild type biomass production under each media  
175 formulation, followed by the predicted biomass production under each knockout condition, and

176 concluding with the overall predictive accuracy and Matthew's Correlation Coefficient (MCC)  
177 when compared to experimental knockout data. It is dependent on the following included scripts:  
178 switchToH2.m, switchToFormate.m, setMethaneSecretion.m.

### 179 **switchToH2.m**

180 This Matlab script changes the growth conditions for the iMR539 model such that the *in silico*  
181 media contains hydrogen and carbon dioxide as the main substrates, plus acetate as a  
182 supplementary source. It also constrains methane secretion to 50 mmol/(gDCW·h) and bounds  
183 maximum flux through Eha/Ehb to 5 mmol/(gDCW·h). It is dependent on the  
184 setMethaneSecretion.m script.

### 185 **switchToFormate.m**

186 This Matlab script changes the growth conditions for the iMR539 model such that the *in silico*  
187 media contains formate as the main substrate, plus acetate as a supplementary source. It also  
188 constrains methane secretion to 50 mmol/(gDCW·h) and bounds maximum flux magnitude  
189 through Eha/Ehb to 5 mmol/(gDCW·h). It is dependent on the setMethaneSecretion.m script.

### 190 **switchToNH3.m**

191 This Matlab script sets the nitrogen source for the iMR539 model as ammonia, the default  
192 substrate used in standard culturing conditions, by allowing unlimited ammonia uptake.

### 193 **setMethaneSecretion.m**

194 This Matlab script sets the methane secretion rate for the iMR539 model to a specified value,  
195 effectively constraining the biomass production, product secretion, and uptake rates of the model  
196 during simulation. It also constrains the magnitude of flux through Eha/Ehb to 10% of the  
197 methane secretion rate to enforce our assumption that Eha/Ehb can only play an anaplerotic role  
198 during growth.

### 199 **removeEhaBounds.m**

200 This Matlab script removes the constraints on iMR539 for the Eha/Ehb reaction(s), allowing flux  
201 up to standard lower/upper bounds of -1000/1000.

### 202 **optimizeThermoModel.m**

203 This Matlab script adds overall free energy predictions for simulating the iMR539 model,  
204 returning a predicted value for overall Gibbs free energy. It is dependent on the presence of a  
205 "freeEnergy" array in the supplied model, a feature which exists only in the Matlab version of  
206 iMR539 (iMR539.mat). For more information on this script, please refer to Supplementary File  
207 4.

## 208 **switchToSpecificFd.m**

209 This Matlab script changes several reactions in the iMR539 model by creating 2 new specific  
210 types of ferredoxin. The original ferredoxin species—cpd11620 and cpd11621—are considered  
211 “promiscuous” ferredoxins and this script creates specific species—Fdrd\*1/2 and Fdox\*1/2—  
212 that each appear in only a few reactions. These changes have little effect on standard growth  
213 predictions; however, they may prove important in future simulations involving ferredoxin  
214 specificity.

215

## 216 **References**

- 217 1. **Sarmiento F, Mrázek J, Whitman WB.** 2013. Genome-scale analysis of gene function in  
218 the hydrogenotrophic methanogenic archaeon *Methanococcus maripaludis*. Proc Natl Acad  
219 Sci **110**:4726–4731.
- 220 2. **Sander R.** 2015. Compilation of Henry’s law constants (version 4.0) for water as solvent.  
221 Atmos Chem Phys **15**:4399–4981.
- 222 3. **Schellenberger J, Que R, Fleming RMT, Thiele I, Orth JD, Feist AM, Zielinski DC,**  
223 **Bordbar A, Lewis NE, Rahmanian S, Kang J, Hyduke DR, Palsson BØ.** 2011.  
224 Quantitative prediction of cellular metabolism with constraint-based models: the COBRA  
225 Toolbox v2.0. Nat Protoc **6**:1290–1307.
- 226 4. **Li C, Donizelli M, Rodriguez N, Dharuri H, Endler L, Chelliah V, Li L, He E, Henry A,**  
227 **Stefan MI, Snoep JL, Hucka M, Novère NL, Laibe C.** 2010. BioModels Database: An  
228 enhanced, curated and annotated resource for published quantitative kinetic models. BMC  
229 Syst Biol **4**:92.

230
